# Supplementary material for: Oxidative damage and DNA repair in desiccated recalcitrant embryonic axes of Acer pseudoplatanus L
Source: PubMed Central journal article supplement (PMC8767751; doi:10.1186/s12870-021-03419-2), 2022-01-19
Supplement: 12870_2021_3419_MOESM1_ESM.pdf [file 12870_2021_3419_MOESM1_ESM.pdf]

Figure S1. The impact of increasing concentrations of  $\text{H}_2\text{O}_2$  on formation of comets from nuclei embedded in LMP agarose in the alkaline comet assay

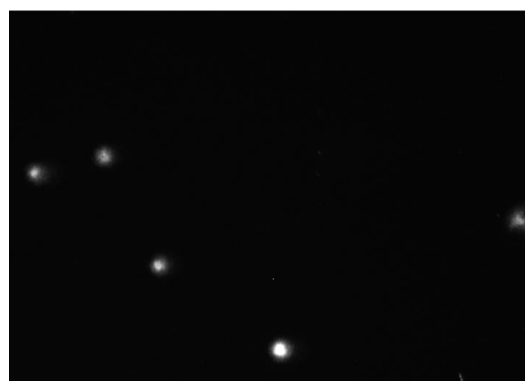

0  $\mu\text{M}$

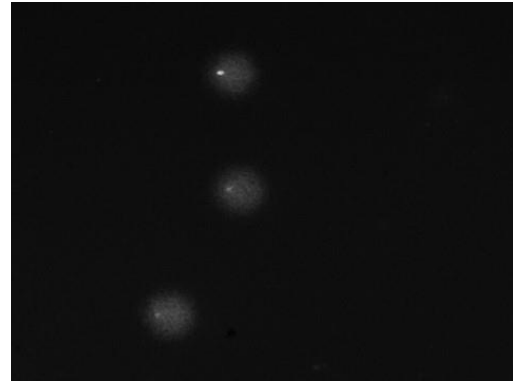

50  $\mu\text{M}$

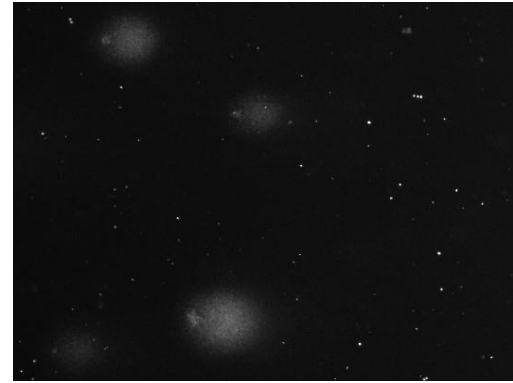

100  $\mu\text{M}$

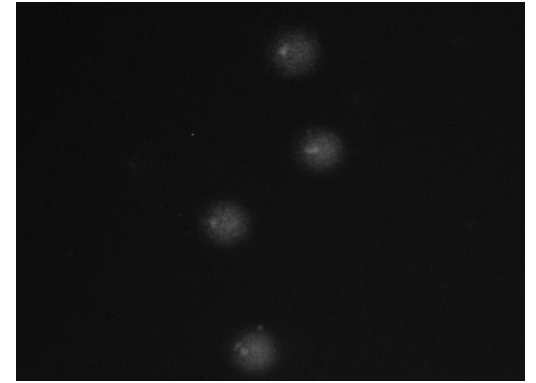

250  $\mu\text{M}$

$\text{H}_2\text{O}_2$
