# Supplementary material for: Oxidative damage and DNA repair in desiccated recalcitrant embryonic axes of Acer pseudoplatanus L
Source: PubMed Central journal article supplement (PMC8767751; doi:10.1186/s12870-021-03419-2), 2022-01-19

Figure S3. The representative comet measurements and images captured by Comet Assay IV analysis software

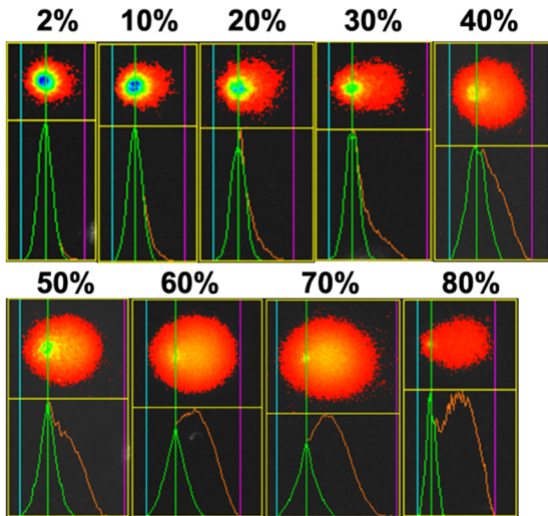

Supplement: 12870_2021_3419_MOESM3_ESM.pdf [file 12870_2021_3419_MOESM3_ESM.pdf]
