# Supplementary material for: Oxidative damage and DNA repair in desiccated recalcitrant embryonic axes of Acer pseudoplatanus L
Source: PubMed Central journal article supplement (PMC8767751; doi:10.1186/s12870-021-03419-2), 2022-01-19
Supplement: 12870_2021_3419_MOESM4_ESM.pdf [file 12870_2021_3419_MOESM4_ESM.pdf]

**Table S1.** Table of coordinates of variables used in principal component analysis.

| <b>Variable</b> | <b>Dim.1</b> | <b>Dim.2</b> | <b>Dim.3</b> | <b>Dim.4</b> | <b>Dim.5</b> | <b>Dim.6</b> | <b>Dim.7</b> | <b>Dim.8</b> | <b>Dim.9</b> |
|-----------------|--------------|--------------|--------------|--------------|--------------|--------------|--------------|--------------|--------------|
| OH              | 0.330101     | 0.556496     | 0.400577     | -0.6365      | -0.06074     | 0.046031     | -0.09337     | -0.03324     | 0.002457     |
| ROS             | 0.372993     | -0.82509     | 0.158458     | 0.118255     | -0.37257     | 0.014512     | -0.02419     | -0.03046     | -0.01707     |
| TTC             | -0.91159     | -0.18703     | 0.33096      | -0.00566     | -0.03977     | -0.07723     | -0.08761     | 0.084264     | -0.00949     |
| Regrow.         | -0.95233     | -0.12245     | 0.221301     | -0.14372     | -0.0557      | -0.00778     | 0.049133     | 0.041487     | 0.009398     |
| Surviv.         | -0.92786     | -0.1417      | 0.291107     | -0.15712     | -0.00051     | -0.01161     | 0.084288     | 0.001083     | 0.026242     |
| SB t0h          | 0.947885     | 0.206363     | -0.14778     | 0.00716      | -0.01551     | -0.16654     | -0.03352     | 0.070637     | -0.0125      |
| SB t1h          | 0.788628     | 0.256269     | 0.506139     | 0.154955     | 0.021842     | 0.146172     | 0.070649     | 0.059862     | -0.04224     |
| SB t18h         | 0.77465      | 0.292626     | 0.503625     | 0.165917     | -0.06116     | -0.1482      | 0.062255     | -0.02869     | 0.043112     |
| 8-oxoG t0h      | 0.368346     | -0.79564     | 0.152868     | -0.39071     | 0.20151      | -0.09878     | 0.044898     | -0.02871     | -0.04401     |
| 8-oxoG t1h      | 0.742599     | -0.28728     | -0.3716      | -0.45121     | -0.10683     | 0.053645     | 0.058814     | 0.066135     | 0.038346     |
| 8-oxoG t18h     | 0.58684      | -0.70295     | 0.275465     | 0.169809     | 0.203138     | 0.076234     | -0.08078     | 0.015652     | 0.050597     |

**Table S2.** Table of contribution of variables used in principal component analysis.

| <b>Variable</b> | <b>Dim.1</b> | <b>Dim.2</b> | <b>Dim.3</b> | <b>Dim.4</b> | <b>Dim.5</b> | <b>Dim.6</b> | <b>Dim.7</b> | <b>Dim.8</b> | <b>Dim.9</b> |
|-----------------|--------------|--------------|--------------|--------------|--------------|--------------|--------------|--------------|--------------|
| OH              | 1.816428     | 12.5679      | 13.39627     | 44.95657     | 1.506092     | 2.162109     | 17.97971     | 4.300213     | 0.055212     |
| ROS             | 2.319131     | 27.62778     | 2.096232     | 1.551802     | 56.67399     | 0.214884     | 1.207259     | 3.610468     | 2.665988     |
| TTC             | 13.8524      | 1.419531     | 9.144588     | 0.00356      | 0.645836     | 6.08602      | 15.82931     | 27.63376     | 0.824386     |
| Regrow.         | 15.11804     | 0.608474     | 4.088635     | 2.292179     | 1.266726     | 0.061798     | 4.978748     | 6.698531     | 0.808104     |
| Surviv.         | 14.3512      | 0.814893     | 7.074847     | 2.739365     | 0.000105     | 0.137634     | 14.65204     | 0.004568     | 6.300418     |
| SB t0h          | 14.97739     | 1.728244     | 1.823319     | 0.005688     | 0.098264     | 28.30129     | 2.316612     | 19.41885     | 1.428769     |
| SB t1h          | 10.36739     | 2.665219     | 21.38709     | 2.66447      | 0.194779     | 21.80245     | 10.29385     | 13.94643     | 16.32026     |
| SB t18h         | 10.00312     | 3.475075     | 21.17515     | 3.054785     | 1.527404     | 22.4112      | 7.993098     | 3.2039       | 17.00456     |
| 8-oxoG t0h      | 2.261705     | 25.69022     | 1.950942     | 16.93993     | 16.57918     | 9.95581      | 4.157458     | 3.207268     | 17.71716     |
| 8-oxoG t1h      | 9.192512     | 3.349224     | 11.52795     | 22.59184     | 4.659606     | 2.936566     | 7.13388      | 17.02257     | 13.45295     |
| 8-oxoG t18h     | 5.740689     | 20.05344     | 6.334973     | 3.199805     | 16.84802     | 5.930242     | 13.45803     | 0.953433     | 23.4222      |
